# Supplementary material for: A retrospective observational study of enhanced recovery after surgery in older patients undergoing elective colorectal surgery
Source: PLoS One. 2020 May 8;15(5):e0232857. doi: 10.1371/journal.pone.0232857 (PMC7209103; doi:10.1371/journal.pone.0232857)
Supplement: S1 Data — (XLSX) [file pone.0232857.s003.xlsx]

## Sheet: Databank_PlosOne
NR	Age_op	Gender	Living_sit_3	GRP_score	GRP_alone	GRP_cognition	GRP_mobility	GRP_polypharm	GRP_hospit3m	n_medic	Nutr_risk	Nutr_risk0	Nutr_risk1	Nutr_risk2	Nutr_risk3	Nutr_risk4	CCI_sum	ACCI_sum	BMI	BMI_group	ASA	Type_surg	Site_surg	Surg_approach	Stoma	Surg_extra	Tumor	PreopCT_all	PreopRT_all	ERAS_preop	noPrep_colon	Preop_carb	Preop_medic	TE_profyl	AB_profyl	PONV_profyl_more20	Surg_approach_planned	noNGS_afterOR	Hypotherm_prev	stopIV_perProtocol	NoDrain_colonicS	UC_out_correct	Antico	PCEA	Diet_POD1	Diet_POD2	Diet_POD3	Diabetes_dichot	GDP_diabetes
01	72	1	1	0	0	0	0	0	0	1	0	0	0	0	0	1	1	4	24.3911	2	2	2	1	1	0	0	0	0	0	1	1	1	0	1	1	1	1	1	1	0	1	1	0	1	1	1	1	0	9
02	70	2	1	0	0	0	0	0	0	4	1	0	1	0	0	0	3	6	21.4619	2	3	1	1	1	0	0	1	0	0	1	1	1	0	1	1	1	1	1	1	1	1	1	0	0	1	1	1	0	9
03	70	2	1	1	0	0	0	0	1	3	0	0	0	0	0	1	0	3	29.3947	3	3	1	1	1	0	0	0	0	0	0	1	0	0	1	1	1	1	1	1	1	1	1	0	1	1	1	1	0	9
04	71	1	1	0	0	0	0	0	0	3	0	0	0	0	0	1	3	6	25.3906	3	2	1	1	1	0	0	1	0	0	1	1	1	0	1	1	1	1	1	1	1	1	1	0	1	1	1	1	0	9
05	85	2	1	2	0	0	0	1	1	14	0	0	0	0	0	1	5	9	21.2585	2	4	1	1	2	0	0	1	0	0	1	1	1	0	1	1	1	2	1	1	0	1	99	0	1	1	1	1	1	1
06	73	2	1	1	0	0	0	1	0	7	0	0	0	0	0	1	7	10	32.5521	4	3	3	2	3	1	0	1	0	0	1	9	1	0	1	1	1	1	1	1	2	9	0	0	0	1	1	0	1	1
07	74	2	1	3	1	0	0	1	1	11	0	0	0	0	0	1	4	7	28.4706	3	4	2	1	1	2	1	1	0	0	1	1	1	0	1	1	1	1	1	1	1	0	0	1	0	1	1	1	0	9
08	72	1	1	1	0	0	0	1	0	12	0	0	0	0	0	1	5	8	35.8836	4	3	2	1	1	0	0	1	0	0	1	1	1	0	1	1	1	1	1	1	1	1	1	0	1	1	1	1	1	1
09	84	1	1	1	0	0	0	0	1	4	0	0	0	0	0	1	0	4	24.3418	2	3	1	1	3	0	0	0	0	0	0	1	1	0	1	1	1	1	1	0	1	0	1	1	0	1	1	1	0	9
10	81	1	1	2	0	0	1	1	0	5	1	0	1	0	0	0	3	7	23.8754	2	3	2	1	2	1	1	1	0	0	1	0	1	0	1	1	1	2	1	1	2	0	99	0	1	0	0	0	0	9
11	73	2	1	1	1	0	0	0	0	3	0	0	0	0	0	1	2	5	28.7037	3	3	3	2	1	2	0	1	1	1	1	9	1	0	1	1	1	1	1	0	0	9	1	0	1	1	1	1	0	9
12	82	2	2	2	0	0	0	1	1	7	1	0	0	1	0	0	2	6	25.4327	3	3	1	1	1	0	0	0	0	0	1	1	1	0	1	1	1	1	1	1	1	1	1	1	0	1	1	1	1	1
13	77	1	3	3	0	0	1	1	1	6	1	0	1	0	0	0	4	7	29.9688	3	3	3	2	1	1	0	1	1	1	1	9	1	0	1	1	1	1	1	1	2	9	0	0	1	1	1	1	1	1
14	71	1	1	2	1	0	0	1	0	5	0	0	0	0	0	1	4	7	27.8307	3	3	3	2	1	2	0	1	1	1	1	9	1	0	1	1	1	1	1	0	0	9	1	0	1	1	1	1	0	9
15	77	1	1	2	0	0	1	1	0	9	0	0	0	0	0	1	4	7	27.6655	3	3	1	1	1	0	0	1	0	0	1	1	1	0	1	1	9	1	1	1	0	1	1	1	0	1	1	1	0	9
16	83	2	1	2	0	0	0	1	1	9	1	1	0	0	0	1	5	9	19.7531	2	4	1	1	2	0	1	1	0	0	0	1	1	0	1	1	0	2	1	1	2	0	0	0	1	99	99	99	0	9
17	83	1	1	1	0	0	0	1	0	6	1	1	0	0	0	1	2	6	19.1001	2	2	2	1	1	1	0	1	0	0	0	1	0	1	1	1	1	1	1	0	1	1	999	0	0	1	1	1	0	9
18	75	1	1	1	1	0	0	0	0	0	0	0	0	0	0	1	0	3	22.5183	2	1	1	1	1	0	0	0	0	0	1	1	0	0	1	1	1	1	1	1	1	1	1	0	1	1	1	1	0	9
19	75	1	1	0	0	0	0	0	0	3	2	0	1	1	0	0	2	5	23.7332	2	2	1	1	1	0	0	1	0	0	1	1	1	0	1	1	1	1	1	1	1	1	1	0	1	1	1	1	0	9
20	84	1	1	4	1	0	1	1	1	5	0	0	0	0	0	1	2	6	26.847	3	3	3	2	1	1	0	1	0	0	0	9	0	0	1	1	1	1	1	1	1	9	1	0	1	1	1	1	0	9
21	80	2	1	1	0	0	0	0	1	2	0	0	0	0	0	1	3	7	26.0044	3	2	1	1	1	1	0	0	0	0	0	1	1	0	1	1	1	1	1	1	1	1	999	0	0	1	1	1	0	9
22	92	2	1	3	1	0	1	1	0	6	0	0	0	0	0	1	3	7	25.0995	3	3	3	2	1	1	0	1	0	1	1	9	1	0	1	1	1	1	1	1	2	9	0	0	1	1	0	0	0	9
23	84	1	1	3	0	0	1	1	1	8	0	0	0	0	0	1	2	6	38.9543	4	3	3	2	1	1	0	1	0	0	0	9	0	0	1	1	1	1	1	1	2	9	1	0	1	1	1	1	0	9
24	76	2	1	2	0	0	1	0	1	4	0	0	0	0	0	1	10	13	22.8542	2	3	2	1	1	0	0	1	0	0	1	1	1	0	1	1	1	1	1	1	1	1	1	0	1	1	1	1	1	1
25	72	2	1	0	0	0	0	0	0	4	0	0	0	0	0	1	0	3	36.7309	4	3	2	1	1	0	0	0	0	0	1	1	1	0	1	1	1	1	1	1	0	1	1	0	1	1	1	1	0	9
26	70	1	1	1	1	0	0	0	0	3	0	0	0	0	0	1	2	5	27.1416	3	2	2	1	1	0	0	1	0	0	1	1	1	0	1	1	1	1	1	1	1	1	1	0	1	1	1	1	0	9
27	74	2	1	1	0	0	0	1	0	7	1	0	1	0	0	0	4	7	25.2493	3	2	1	1	1	0	0	1	0	0	1	1	1	0	1	1	1	1	1	1	1	0	1	0	1	1	1	1	0	9
28	77	1	1	1	0	0	0	1	0	7	2	1	1	0	0	0	5	8	18.6721	2	3	1	1	1	0	0	1	0	0	1	1	0	0	1	1	1	1	1	1	0	1	0	0	1	1	1	1	1	0
29	87	2	1	2	0	0	0	1	1	5	1	0	1	0	0	0	3	7	22.7244	2	3	1	1	2	0	1	1	0	0	1	1	1	0	1	1	1	2	1	1	0	1	0	0	1	1	1	99	0	9
30	70	2	1	0	0	0	0	0	0	2	0	0	0	0	0	1	3	6	24.8356	2	2	3	2	1	2	1	1	0	0	1	9	1	0	1	1	1	1	1	1	0	9	1	0	1	0	1	1	0	9
31	91	1	1	5	1	2	1	1	0	5	0	0	0	0	0	1	3	7	23.4586	2	2	1	1	3	0	0	1	0	0	1	1	1	0	1	1	1	1	1	1	1	1	1	0	0	0	1	1	0	9
32	73	2	1	1	0	0	0	0	1	4	1	0	0	1	0	0	1	4	30.3704	4	3	4	2	1	2	0	0	0	0	1	9	0	0	1	1	1	1	1	1	2	9	1	0	1	1	1	0	0	9
33	71	1	1	1	0	0	0	1	0	7	0	0	0	0	0	1	1	4	31.2295	4	2	3	2	1	0	0	0	0	0	1	9	0	0	1	1	0	1	0	1	0	9	1	0	1	0	1	1	1	1
34	84	2	2	1	1	0	0	0	0	4	1	0	1	0	0	0	4	8	23.8754	2	4	3	2	1	1	0	1	0	0	1	9	1	0	1	1	1	1	1	1	0	9	99	1	0	1	1	1	0	9
35	75	2	1	2	0	0	0	1	1	5	0	0	0	0	0	1	2	5	24.3438	2	3	1	1	1	0	0	1	0	0	1	1	0	0	1	1	1	1	1	1	0	1	1	0	1	1	1	1	0	9
36	83	1	1	4	1	0	1	1	1	6	0	0	0	0	0	1	4	8	24.2382	2	2	3	2	1	2	0	1	0	0	1	9	1	0	1	1	1	1	1	1	0	9	1	0	1	1	1	1	0	9
37	82	1	3	2	0	0	1	1	0	12	0	0	0	0	0	1	3	7	30.854	4	3	1	1	1	0	0	1	0	0	1	1	1	0	1	1	1	1	1	0	0	1	1	0	1	1	1	1	0	9
38	82	1	1	3	0	0	1	1	1	7	0	0	0	0	0	1	6	10	26.5731	3	3	1	1	2	1	0	1	0	0	1	1	1	0	1	1	1	2	1	1	1	1	1	0	1	1	1	1	0	9
39	79	1	1	3	1	0	0	1	1	8	2	0	1	1	0	0	3	6	25.0657	3	3	1	1	1	0	0	1	0	0	1	1	1	0	1	1	1	1	1	1	1	1	1	0	0	1	1	1	0	9
40	79	2	1	2	0	0	1	1	0	8	0	0	0	0	0	1	4	7	25.3815	3	2	3	2	1	2	0	1	0	1	1	9	1	0	1	1	0	1	1	1	1	9	1	0	1	1	1	1	1	1
41	75	2	1	0	0	0	0	0	0	3	1	0	1	0	0	0	6	9	23.1481	2	3	3	2	2	0	0	1	0	0	1	9	1	1	1	1	1	2	1	1	0	9	0	0	1	1	1	1	0	9
42	77	2	1	1	0	0	0	1	0	19	0	0	0	0	0	1	3	6	27.6095	3	3	2	1	1	0	1	0	0	0	1	1	0	0	1	1	1	1	1	1	0	1	0	0	1	1	1	1	1	1
43	82	2	1	3	1	0	1	0	1	4	1	0	1	0	0	0	2	6	26.8274	3	1	1	1	1	0	0	1	0	0	1	1	0	0	0	1	1	1	1	0	999	1	9	0	0	9	9	9	0	9
44	70	2	1	0	1	0	0	0	0	3	0	0	0	0	0	1	2	5	27.4717	3	2	1	1	1	0	0	1	0	0	1	1	1	0	1	1	1	1	1	1	1	1	1	0	1	1	1	1	0	9
45	76	2	1	2	0	0	0	1	1	11	1	0	1	0	0	0	5	8	24.3375	2	4	3	2	1	2	0	1	0	0	1	9	1	0	1	1	1	1	1	1	0	9	1	1	0	1	1	1	1	1
46	70	1	1	1	0	0	0	1	0	5	1	1	0	0	0	1	0	3	20.2395	2	3	4	1	1	0	0	0	0	0	1	1	1	0	1	1	1	1	1	1	1	1	1	0	1	1	1	1	0	9
47	72	2	1	1	1	0	0	0	0	3	1	0	1	0	0	0	2	5	24.1517	2	2	3	2	1	2	0	0	0	0	1	9	1	0	1	1	1	1	1	1	0	9	1	0	1	1	1	1	0	9
48	88	2	2	3	0	0	1	1	1	8	0	0	0	0	0	0	4	8	31.3468	4	4	1	1	2	0	1	1	0	0	0	1	0	0	1	1	1	2	1	1	0	1	0	1	0	1	1	1	0	9
49	75	1	1	1	0	0	0	1	0	7	0	0	0	0	0	1	3	6	25.8065	3	3	2	1	1	0	0	0	0	0	1	1	1	0	1	1	1	1	1	0	0	0	0	0	1	1	1	1	0	9
50	74	2	1	0	0	0	0	0	0	4	1	1	0	0	0	1	3	6	19.3698	2	3	2	1	1	0	0	1	0	0	1	1	1	0	1	1	1	1	1	1	1	1	1	0	1	1	1	1	0	9
51	84	1	1	3	0	0	1	1	1	5	0	0	0	0	0	1	2	6	25.1532	3	2	2	1	3	0	1	1	0	0	1	1	1	0	1	1	1	1	1	1	0	0	1	0	1	1	0	0	0	9
52	74	1	1	1	0	0	0	1	0	8	0	0	0	0	0	1	0	3	28.578	3	3	2	1	1	1	0	0	0	0	1	1	1	0	1	1	1	1	1	0	1	1	999	0	0	1	1	1	0	9
53	81	1	1	1	0	0	0	1	0	5	0	0	0	0	0	1	3	7	22.7732	2	2	1	1	1	0	0	1	0	0	1	1	0	0	1	1	1	1	1	1	1	1	1	0	1	1	1	1	1	1
54	79	1	1	1	0	0	0	1	0	7	0	0	0	0	0	1	7	10	25.721	3	3	1	1	1	0	1	1	0	0	1	1	1	0	1	1	1	1	1	1	1	1	1	0	1	1	0	1	0	9
55	94	2	1	1	1	0	0	0	0	4	0	0	0	0	0	1	3	7	22.0243	2	3	3	2	2	0	0	1	0	0	0	9	0	0	1	1	1	2	1	1	0	9	1	1	1	1	1	1	0	9
56	76	1	1	0	0	0	0	0	0	4	0	0	0	0	0	1	3	6	23.7387	2	3	3	2	1	0	0	1	0	0	1	9	0	0	1	1	1	1	1	1	0	9	1	0	1	1	1	1	0	9
57	72	2	1	1	0	0	0	1	0	16	0	0	0	0	0	1	5	8	35.3415	4	3	3	2	1	2	0	1	0	0	1	9	1	0	1	1	1	1	1	1	0	9	1	0	1	1	1	1	1	1
58	85	2	1	0	0	0	0	0	0	4	0	0	0	0	0	1	3	7	25.0593	3	3	1	1	1	0	0	1	0	0	1	1	1	0	1	1	1	1	1	1	0	0	1	0	1	1	1	1	0	9
59	89	1	1	3	1	0	0	1	1	6	0	0	0	0	0	1	3	7	27.8098	3	3	3	2	1	0	0	1	0	0	1	9	1	0	1	1	9	1	1	1	1	9	1	0	0	1	1	1	0	9
60	84	1	1	2	0	0	0	1	1	6	1	1	0	0	0	1	2	6	19.1001	2	3	3	2	1	2	0	1	0	1	1	9	1	0	1	1	1	1	1	1	2	9	1	0	1	1	1	1	0	9
61	80	1	1	2	1	0	0	0	1	2	0	0	0	0	0	1	2	6	22.4941	2	3	3	2	1	2	0	1	1	1	1	9	1	0	1	1	1	1	1	1	0	9	1	0	1	1	1	1	0	9
62	77	1	1	2	0	0	0	1	1	5	1	1	0	0	0	1	1	4	18.7305	2	2	2	1	1	0	1	0	0	0	1	1	0	0	1	1	1	1	1	1	0	1	1	0	1	0	0	1	0	9
63	81	2	1	2	0	0	0	1	1	8	0	0	0	0	0	1	10	14	23.9838	2	4	1	1	1	0	0	1	0	0	1	1	1	0	1	1	1	1	1	1	0	1	1	0	1	0	1	1	0	9
64	74	1	1	0	0	0	0	0	0	3	1	0	1	0	0	0	2	5	25.204	3	2	3	2	3	2	0	1	1	1	1	9	1	0	1	1	1	1	1	1	0	9	1	0	1	1	1	1	0	9
65	81	1	1	3	1	0	1	1	0	9	0	0	0	0	0	1	2	6	29.9967	4	3	1	1	1	0	0	1	0	0	1	1	0	0	1	1	1	1	1	1	0	1	1	0	1	1	1	0	0	9
66	74	2	1	2	0	0	0	1	1	7	0	0	0	0	0	1	3	6	25.4694	3	3	3	2	2	1	1	1	0	0	0	9	1	0	1	1	1	2	0	0	0	9	1	1	0	0	0	1	0	9
67	81	1	1	2	0	0	0	1	1	10	1	0	1	0	0	0	3	7	27.6888	3	3	1	1	1	0	0	1	0	0	1	1	1	1	1	1	1	1	1	1	1	1	1	0	1	1	1	1	1	1
68	80	1	1	3	0	0	1	1	1	7	0	0	0	0	0	0	1	5	27.6995	3	3	2	1	1	0	0	0	0	0	1	1	1	0	1	1	1	1	1	0	0	0	0	0	1	1	1	1	0	9
69	71	2	1	1	0	0	0	1	0	11	0	0	0	0	0	1	3	6	32.3468	4	4	1	1	2	0	0	0	0	0	1	1	1	1	1	1	1	2	1	1	0	1	1	1	0	1	1	1	0	9
70	84	2	3	2	0	0	0	1	1	7	1	0	1	0	0	0	5	9	27.0842	3	3	1	1	2	0	0	1	0	0	1	1	1	0	1	1	1	2	1	1	0	1	1	0	0	1	1	1	0	9
71	70	1	1	1	1	0	0	0	0	0	0	0	0	0	0	1	2	5	21.4844	2	2	3	2	1	2	0	1	1	1	1	9	1	0	1	1	1	1	1	0	1	9	1	0	0	1	1	1	0	9
72	79	1	1	3	0	0	1	1	1	12	0	0	0	0	0	1	3	6	30.1021	4	3	1	1	1	0	0	1	0	0	1	1	1	0	1	1	1	1	1	1	1	1	1	0	0	1	1	1	0	9
73	71	2	1	0	0	0	0	0	0	1	0	0	0	0	0	1	3	6	25.9259	3	3	1	1	2	0	0	1	0	0	1	1	0	0	1	1	1	2	1	1	1	1	1	0	1	1	1	1	0	9
74	82	1	3	2	0	0	1	1	0	12	0	0	0	0	0	1	3	7	22.8624	2	2	1	1	1	0	0	1	0	0	1	1	0	0	1	1	1	1	1	1	1	1	1	0	1	1	1	1	1	1
75	84	2	1	0	0	0	0	0	0	1	0	0	0	0	0	1	3	7	20.7612	2	2	3	2	3	2	0	1	0	0	1	9	0	0	1	1	1	1	1	1	0	9	1	0	1	1	0	1	0	9
76	80	2	1	2	0	0	0	1	1	6	1	0	1	0	0	0	3	7	22.9181	2	3	3	2	2	1	1	0	0	0	1	9	0	0	1	1	0	2	1	1	0	9	1	0	1	1	1	1	0	9
77	78	1	1	0	0	0	0	0	0	2	0	0	0	0	0	1	1	4	34.0636	4	2	2	1	1	0	0	0	0	0	1	1	1	1	1	1	1	1	1	1	1	1	1	0	1	1	1	1	0	9
78	76	1	1	0	0	0	0	0	0	4	0	0	0	0	0	1	3	6	30.0433	4	3	3	2	1	0	0	1	0	0	1	9	1	0	1	1	1	1	1	1	1	9	1	0	1	1	1	1	0	9
79	75	2	1	3	0	0	1	1	1	13	0	0	0	0	0	1	5	8	32.2421	4	4	2	1	3	0	0	0	0	0	1	1	0	0	1	1	1	1	1	1	0	1	0	0	0	1	1	99	1	1
80	72	1	1	1	0	0	0	1	0	8	0	0	0	0	0	1	4	7	32.112	4	2	3	2	1	0	0	1	0	0	1	9	1	0	1	1	1	1	1	1	1	9	1	0	0	1	1	1	1	1
81	70	1	1	1	0	0	0	1	0	7	1	0	1	0	0	0	2	5	47.0709	4	3	3	2	3	0	0	1	1	1	1	9	0	0	1	1	1	1	0	1	2	9	0	0	1	0	1	99	0	9
82	75	1	1	4	1	2	0	0	1	3	0	0	0	0	0	1	6	9	26.4001	3	3	3	2	1	2	0	1	0	0	1	9	1	0	1	1	1	1	1	1	1	9	1	1	0	0	1	1	0	9
83	78	2	1	1	0	0	0	0	1	2	1	0	1	0	0	0	0	3	21.1835	2	2	1	1	2	0	1	0	0	0	1	1	0	0	1	1	1	2	0	1	2	1	1	1	1	0	0	0	0	9
84	82	1	1	4	1	2	0	1	0	6	1	1	0	0	0	1	8	12	20.4491	2	3	1	1	1	0	0	1	0	0	1	1	1	0	1	1	1	1	1	1	0	1	1	0	1	1	0	0	0	9
85	83	1	1	2	1	0	0	1	0	8	0	0	0	0	0	1	3	7	29.5858	3	3	3	2	1	2	0	1	1	1	1	9	1	0	1	1	1	1	1	1	0	9	0	1	0	99	99	1	0	9
86	73	2	1	1	0	0	0	1	0	6	0	0	0	0	0	1	2	5	24.3265	2	3	4	1	1	0	0	0	0	0	1	1	0	0	1	1	1	1	1	1	1	1	1	0	1	1	1	1	0	9
87	81	2	1	1	0	0	0	1	0	5	0	0	0	0	0	1	3	7	25.0135	3	3	1	1	1	0	0	1	0	0	1	1	0	0	1	1	1	1	1	1	1	1	0	0	1	0	1	1	0	9
88	78	2	1	2	1	0	0	1	0	8	0	0	0	0	0	1	1	4	24.8016	2	3	2	1	1	0	0	0	0	0	1	1	0	0	1	1	1	1	1	1	1	1	1	0	1	1	1	1	0	9
89	73	2	1	2	1	0	0	0	1	4	3	1	1	1	0	0	6	9	19.9432	2	3	1	1	3	0	1	1	1	0	1	1	0	1	1	1	1	1	1	0	0	1	1	0	1	1	1	1	0	9
90	72	2	1	0	0	0	0	0	0	1	0	0	0	0	0	1	3	6	24.1357	2	2	2	1	1	0	0	1	0	0	1	1	1	0	1	1	0	1	1	1	1	0	1	0	0	1	1	1	1	1
91	80	2	1	0	0	0	0	0	0	2	0	0	0	0	0	1	2	6	29.3848	3	2	3	2	1	1	0	1	1	1	1	9	1	0	1	1	1	1	1	1	0	9	0	0	0	0	1	1	0	9
92	71	2	1	2	0	0	1	1	0	6	0	0	0	0	0	1	6	9	27.9184	3	3	3	2	3	2	0	1	1	1	1	9	1	0	1	1	1	1	1	1	0	9	0	0	0	1	0	0	1	1
93	71	1	1	0	0	0	0	0	0	0	1	0	1	0	0	0	2	5	29.3848	3	2	3	2	1	0	0	1	0	0	0	9	1	1	1	1	1	1	1	1	1	9	1	0	1	1	1	1	0	9
94	90	2	1	5	0	2	1	1	1	11	2	0	1	1	0	0	5	9	21.9482	2	4	1	1	2	0	0	1	0	0	0	1	0	0	1	1	1	2	1	1	1	1	1	1	1	1	1	1	1	1
95	72	1	1	3	1	0	0	1	1	7	2	0	1	1	0	0	6	9	29.0006	3	2	2	1	1	0	1	0	0	0	1	1	1	1	1	1	1	1	1	1	0	0	0	0	1	0	1	1	0	9
96	87	2	1	3	0	0	1	1	1	8	1	0	1	0	0	0	4	8	21.9713	2	3	2	1	1	1	1	1	0	0	0	1	1	0	1	1	1	1	1	1	1	1	0	1	0	0	1	1	0	9
[truncated: 9 more columns]
